# Supplementary material for: Generation of Otic Lineages from Integration-Free Human-Induced Pluripotent Stem Cells Reprogrammed by mRNAs
Source: Hindawi journal article supplement (doi:10.1155/2020/3692937), 2020-03-01
Supplement: f1 [file 3692937.f1.pdf]

## Supplementary figures



**Supplementary Figure 1.** Pluripotency markers expressed by the lentivirus-induced lines FF1 and FF5. A) Flow cytometry histograms showing, in red, the percentages of cells expressing SSEA3, SSEA4, TRA-1-60 and TRA-1-81. Blue shows the negative, baseline control. B) Expression of *SOX2*, *OCT4* and *NANOG* determined by qPCR on samples from the FF1 and FF5 cell lines, as well as from human fibroblasts. Expression levels are presented as  $2^{-\Delta\Delta C_t}$ .



**Supplementary Figure 2.** Bar charts displaying percentages of double positive otic progenitors obtained per each individual line, expressing high levels of SOX2/PAX8; FOXG1/PAX8 and PAX2/PAX8.



**Supplementary Figure 3.** Bar chart displaying the yields of OEPs and ONPs obtained per individual line.
